# Supplementary material
Source: PubMed Central journal article supplement (PMC2976559)
Supplement: NIHMS233030-supplement-07.pdf [file NIHMS233030-supplement-07.pdf]

**Table S1.** List of primers used for qRT-PCR analysis

|    | Gene           | Forward Primer            | Reverse Primer            |
|----|----------------|---------------------------|---------------------------|
| 1  | Actin          | CAGCCACACTGTCCCATCTA      | AGCAAGGTCGAGACGAAGGA      |
| 2  | LOC_Os01g43540 | CGCATCTGGTGACTCAAGGTT     | AGCAATGCGCTCATCACACT      |
| 3  | LOC_Os01g63420 | GCCACTTGACAATGGTGTCTGT    | TAGAGAGCAAACCTCCGAAGCT    |
| 4  | LOC_Os01g69080 | GGATGAGAGGGCACAATCGA      | TACCCAGCTGAAAGGCAATGT     |
| 5  | LOC_Os02g08440 | GCCCAAGAGCCTACTTCAGATG    | GCTTCTCTGAACCTTCTTCTTGACA |
| 6  | LOC_Os05g02070 | AAGATGTTCCCTGATGTGGAGA    | AGCTGGTGCCACACTTGCA       |
| 7  | LOC_Os06g50300 | AGCAAGCACAATGACGACAAA     | GATAGCGAATGATCCATCAGCTTT  |
| 8  | LOC_Os07g48020 | GGCGCAGTGCCAGAATTT        | AGGCGGAATCGATGTTGGT       |
| 9  | LOC_Os08g17680 | GGAAGTACACCCGCATTGCT      | GGACGTTTGTGCGCAACAC       |
| 10 | LOC_Os12g36850 | GCTAGCTATAGCCATCACAGCAAGT | GGCCGGAGCCATCTCTATC       |
| 11 | LOC_Os12g36880 | GACATCGTGGATGGCTACTATGG   | CAGGGTGAGCGACGAGGTA       |
| 12 | LOC_Os08g10310 | TGGGTTGAGTGGCCCATT        | CCGCAGGAGTTTTAGGTTCTTAAG  |
| 13 | LOC_Os02g02980 | GCTTTGGCATTGGAACCTTTC     | CACCAGCATCCAGGCAAACCT     |
| 14 | LOC_Os12g38210 | TTCATTTCCAGTGGTGTGAA      | CTGGGTTGAGCGCTTTGG        |

**Fig. S1.** Rice plants carrying XA21 protein tagged with N-terminal Myc (A) and C-terminal CFP (B) under the control of its native promoter show resistance to *Xoo* strain PXO99Az.

(A) Kitaake wild type (Kit), Transgenic lines carrying *Xa21* under the control of its native promoter (Nat XA21), and transgenic rice carrying *Myc-Xa21* under the control of its native promoter (Nat Myc-XA21), were inoculated at six weeks of age (9 to 10 leaves stage) and lesion lengths were measured 14 DAI. Each data point represents the average and standard deviation of at least four independent replicates.

(B) Kitaake wild type (Kit), Transgenic lines carrying *Xa21* under the control of its native promoter (Nat XA21), and transgenic rice carrying *Xa21-CFP* under the control of its native promoter (Nat XA21-CFP), were inoculated at six weeks of age and lesion lengths were measured 14 DAI. Each data point represents the average and standard deviation of at least independent replicates.

**Fig. S2.** Rice plants overexpressing *Myc-Xa21* (Ubi Myc-XA21) show enhanced resistance to *Xoo* strain PXO99Az.

(A) Lesion length development of *Xoo* PXO99Az-inoculated six-week-old plants, Kitaake control (Kit), Nat Myc-XA21, and Ubi Myc-XA21. Each data point represents the average and standard deviation of at least four samples.

(B) *Xoo* strain PXO99Az populations were monitored over 12 days in six-week-old plants, Kit, Nat Myc-XA21, and Ubi Myc-XA21 (7A-8-123) rice lines. For each time point, bacterial populations were determined in three separate leaves for each genotype. Capped vertical bars represent standard deviation values (cfu/leaf) obtained from the three samples.

**Fig. S3.** Rice plants overexpressing *Xa21-CFP* (Ubi XA21-CFP) show enhanced resistance to *Xoo* strain PXO99Az.

Kitaake wild type (Kit), transgenic rice carrying *Xa21-CFP* under the control of its native promoter (Nat XA21-CFP), and transgenic lines carrying *Xa21-CFP* under the control of the *Ubi* promoter (Ubi XA21-CFP) were inoculated at six weeks of age and lesion lengths were measured 12 DAI. Each data point represents the average and standard deviation of at least four independent replicates. Gray bars in Ubi Myc-XA21 represent segregants carrying the transgene. Black bars represent segregants not carrying the transgene.

**Fig. S4.** Rice plants overexpressing *Xa21* does not display enhanced resistance to *Xoo* PXO99 $\Delta$ *raxST*.

Six-week-old Kitaake control, Nat Myc-XA21 (T<sub>3</sub>, 20-12) and Ubi Myc-XA21 (T<sub>3</sub>) were inoculated with *Xoo* PXO99 $\Delta$ *raxST* and then lesion lengths were measured 12DAI. Each data point represents the average and standard deviation of at least five samples harvested from each plant.

**Fig. S5.** Rice plants overexpressing *Xa21* does not show enhanced resistance to a fungal pathogen *Magnaporthe oryzae*.

(A) Five-week-old Kitaake control, Nat Myc-XA21 and Ubi Myc-XA21 (T<sub>2</sub>) were inoculated with *M. oryzae* and then lesion lengths were measured 10 DAI. Two representative leaves from each line were displayed.

(B) Lesion lengths of each line, Kitaake control, Nat Myc-XA21 and Ubi Myc-XA21 (T<sub>2</sub>). Each data point represents the average and standard deviation of at least 42 lesion lengths.

## References

- [1] M. Chern, P.E. Canlas, H.A. Fitzgerald, P.C. Ronald, Rice NRR, a negative regulator of disease resistance, interacts with *Arabidopsis* NPR1 and rice NH1, *Plant J* 43 (2005) 623-635.
- [2] S.K. Lee, M.Y. Song, Y.S. Seo, H.K. Kim, S. Ko, P.J. Cao, J.P. Suh, G. Yi, J.H. Roh, S. Lee, G. An, T.R. Hahn, G.L. Wang, P. Ronald, J.S. Jeon, Rice Pi5-mediated resistance to *Magnaporthe oryzae* requires the presence of two coiled-coil-nucleotide-binding-leucine-rich repeat genes, *Genetics* 181 (2009) 1627-1638.
- [3] A. Takahashi, T. Kawasaki, K. Henmi, I.K. Shi, O. Kodama, H. Satoh, K. Shimamoto, Lesion mimic mutants of rice with alterations in early signaling events of defense, *Plant J* 17 (1999) 535-545.
- [4] M.S. Chern, H.A. Fitzgerald, R.C. Yadav, P.E. Canlas, X. Dong, P.C. Ronald, Evidence for a disease-resistance pathway in rice similar to the NPR1-mediated signaling pathway in *Arabidopsis*, *Plant J* 27 (2001) 101-113.
